# Supplementary material for: Glomerulonephritis following COVID-19 infection or vaccination: a multicenter study in South Korea
Source: PubMed Central journal article supplement — Kidney Res Clin Pract. 2024 Mar 20;43(2):165–76. doi: 10.23876/j.krcp.23.219 (PMC11016674; doi:10.23876/j.krcp.23.219), 2024-03-20
Supplement: j-krcp-23-219-Supplementary-Figure-1.pdf [file j-krcp-23-219-Supplementary-Figure-1.pdf]

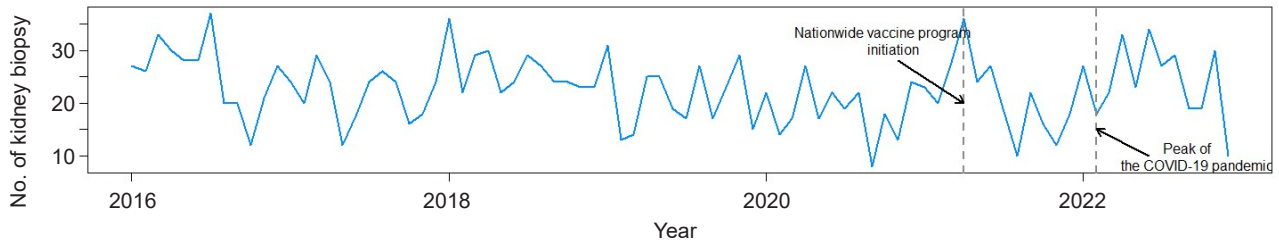

**Supplementary Figure 1.** The monthly trends in the number of kidney biopsies at Severance Hospital from 2016 to 2022. The gray-dotted lines indicate April 2021 and February 2022. COVID-19, coronavirus disease 2019.
