# Supplementary material for: Glomerulonephritis following COVID-19 infection or vaccination: a multicenter study in South Korea
Source: PubMed Central journal article supplement — Kidney Res Clin Pract. 2024 Mar 20;43(2):165–76. doi: 10.23876/j.krcp.23.219 (PMC11016674; doi:10.23876/j.krcp.23.219), 2024-03-20
Supplement: j-krcp-23-219-Supplementary-Figure-3.pdf [file j-krcp-23-219-Supplementary-Figure-3.pdf]

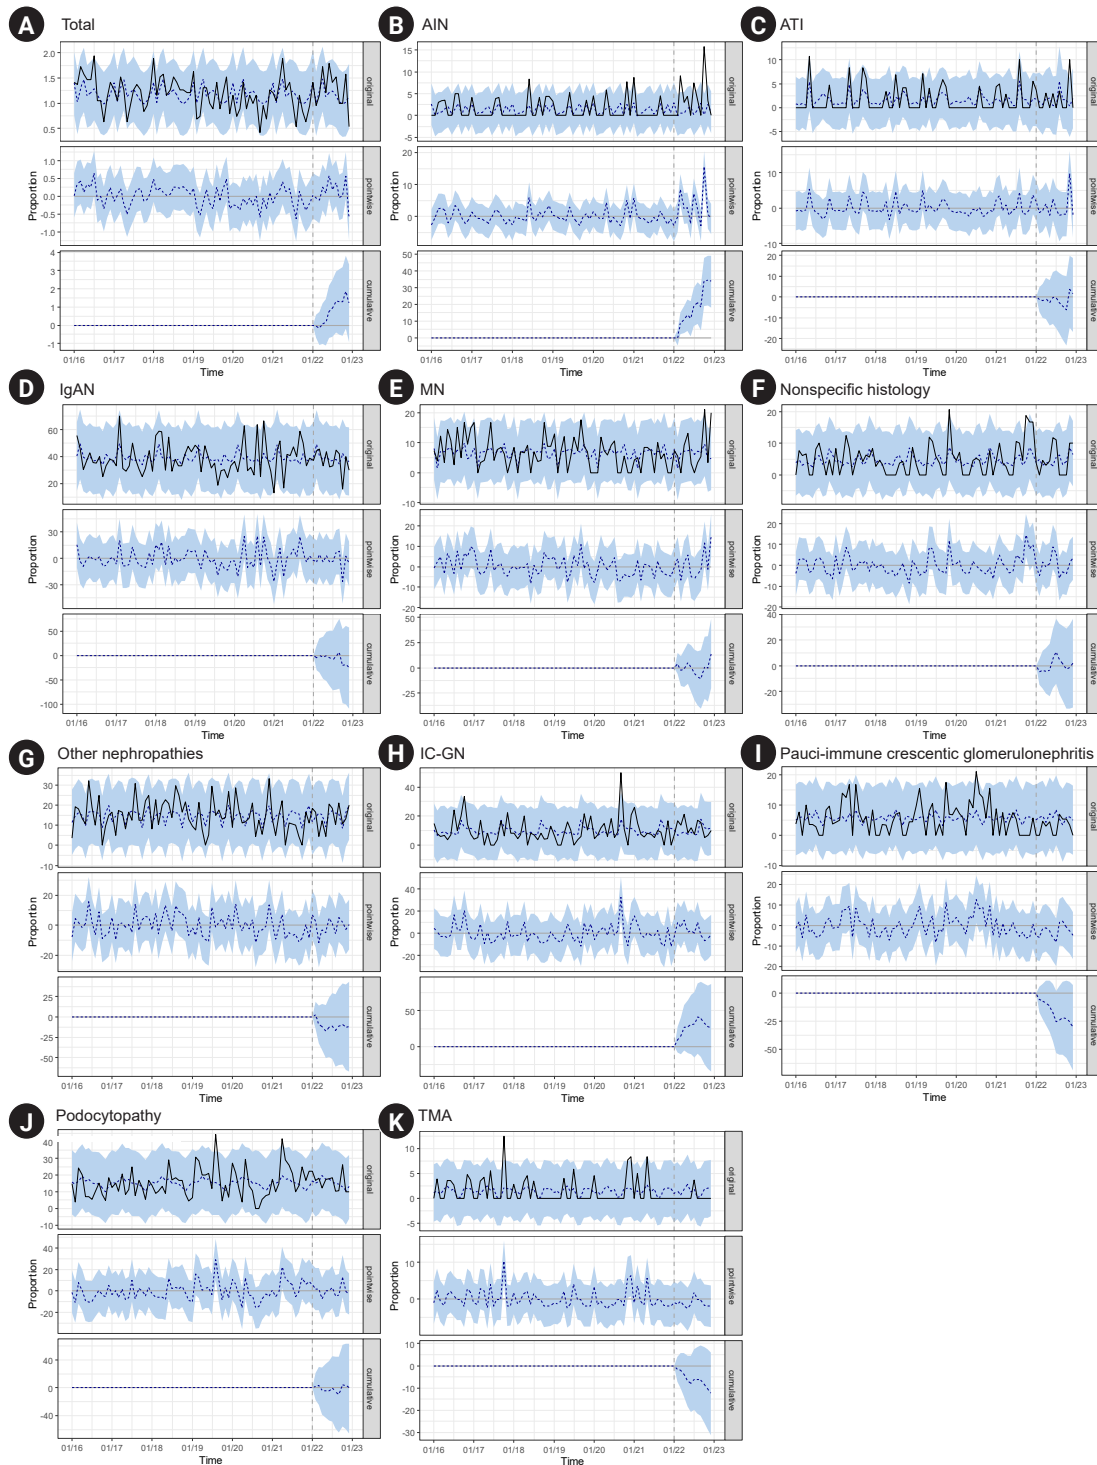

**Supplementary Figure 3.** The monthly trend of glomerulonephritis during the COVID-19 pandemic period (after February 2022) in Severance Hospital based on the Bayesian structural time-series model. (A) Total, (B) acute tubular injury (AIN), (C) acute interstitial nephritis (ATI), (D) immunoglobulin A nephropathy (IgAN), (E) membranous nephropathy (MN), (F) nonspecific histology, (G) other nephropathies, (H) immune complex-mediated glomerulonephritis (IC-GN), (I) pauci-immune crescentic glomerulonephritis, (J) podocytopathy, and (K) thrombotic microangiopathy (TMA). The solid lines denote the observed value, the blue-dotted lines denote the predicted value, and the blue shades denote 95% confidence intervals of the predicted value. The gray-dotted lines denote February 2022. COVID-19, coronavirus disease 2019.
