# Supplementary material for: Glomerulonephritis following COVID-19 infection or vaccination: a multicenter study in South Korea
Source: PubMed Central journal article supplement — Kidney Res Clin Pract. 2024 Mar 20;43(2):165–76. doi: 10.23876/j.krcp.23.219 (PMC11016674; doi:10.23876/j.krcp.23.219), 2024-03-20
Supplement: j-krcp-23-219-Supplementary-Table-1.pdf [file j-krcp-23-219-Supplementary-Table-1.pdf]

**Supplementary Table 1.** Clinical characteristics of 29 patients from Severance Hospital with preceding COVID-19 before kidney biopsy

| Characteristic                                            | Value         |
|-----------------------------------------------------------|---------------|
| Total patient                                             | 29 (100)      |
| Age (yr)                                                  | 50.1 ± 14.9   |
| Female sex                                                | 12 (41.4)     |
| Vaccination before kidney biopsy                          |               |
| No vaccination                                            | 2 (6.9)       |
| Vaccination                                               | 26 (89.7)     |
| Unknown                                                   | 1 (3.4)       |
| Days from first vaccination to kidney biopsy <sup>a</sup> | 347.9 ± 106.4 |
| Vaccine regimen (first)                                   |               |
| BNT162b2 (Pfizer/BioNTech)                                | 14 (48.3)     |
| mRNA-1273 (Moderna Biotech)                               | 6 (20.7)      |
| ChAdOx1 nCoV-19 (Oxford/AstraZeneca)                      | 4 (13.8)      |
| BBIBP-CorV (Sinopharm)                                    | 1 (3.4)       |
| Ad26.COV.S (Johnson & Johnson)                            | 1 (3.4)       |
| Unknown regimen                                           | 1 (3.4)       |
| No vaccination                                            | 2 (6.9)       |
| Days from infection to kidney biopsy <sup>b</sup>         | 99.0 ± 62.1   |
| Pathologic diagnosis                                      |               |
| Acute interstitial nephritis                              | 1 (3.4)       |
| Acute tubular injury                                      | 1 (3.4)       |
| Chronic tubulointerstitial nephritis                      | 1 (3.4)       |
| Diabetic nephropathy                                      | 1 (3.4)       |
| Focal segmental glomerulosclerosis                        | 1 (3.4)       |
| IgAN/Henoch-Schönlein purpura nephritis                   | 16 (55.2)     |
| Lupus nephritis                                           | 1 (3.4)       |
| Minimal change disease                                    | 1 (3.4)       |
| Membranous nephropathy                                    | 2 (6.9)       |
| Membranoproliferative glomerulonephritis                  | 2 (6.9)       |
| Nonspecific histology                                     | 1 (3.4)       |
| Podocytopathy                                             | 1 (3.4)       |

Data are expressed as number (%) or mean ± standard deviation.

COVID-19, coronavirus disease 2019; IgAN, immunoglobulin A nephropathy.

<sup>a</sup>Missing values in 17 (58.6%); <sup>b</sup>missing values in 8 (27.6%).
