# Supplementary material for: Glomerulonephritis following COVID-19 infection or vaccination: a multicenter study in South Korea
Source: PubMed Central journal article supplement — Kidney Res Clin Pract. 2024 Mar 20;43(2):165–76. doi: 10.23876/j.krcp.23.219 (PMC11016674; doi:10.23876/j.krcp.23.219), 2024-03-20
Supplement: j-krcp-23-219-Supplementary-Table-2.pdf [file j-krcp-23-219-Supplementary-Table-2.pdf]

**Supplementary Table 2.** Clinical characteristics of patients from Severance Hospital according to COVID-19 vaccination history before biopsy

| Characteristic                                            | Vaccination before kidney biopsy (n = 83) | No vaccination before kidney biopsy (n = 24) | p-value |
|-----------------------------------------------------------|-------------------------------------------|----------------------------------------------|---------|
| Age (yr)                                                  | 45.0 (34.5–58.0)                          | 41.0 (33.0–54.5)                             | 0.52    |
| Female sex                                                | 43 (51.8)                                 | 17 (70.8)                                    | 0.16    |
| Days from first vaccination to kidney biopsy <sup>b</sup> | 140.0 (77.0–272.0)                        | -                                            | -       |
| Vaccine regimen (first)                                   |                                           |                                              | -       |
| BNT162b2 (Pfizer/BioNTech)                                | 45 (54.2)                                 | -                                            |         |
| ChAdOx1 nCoV-19 (Oxford/AstraZeneca)                      | 16 (19.3)                                 | -                                            |         |
| Ad26.COV.S (Johnson & Johnson)                            | 10 (12.0)                                 | -                                            |         |
| mRNA-1273 (Moderna Biotech)                               | 6 (7.2)                                   | -                                            |         |
| Unknown regimen                                           | 5 (6.0)                                   | -                                            |         |
| NVX-CoV2373 (Novavax)                                     | 1 (1.2)                                   | -                                            |         |
| Pathologic diagnosis                                      |                                           |                                              | 0.67    |
| Acute interstitial nephritis                              | 2 (2.4)                                   | 0 (0)                                        |         |
| Chronic tubulointerstitial nephritis                      | 1 (1.2)                                   | 0 (0)                                        |         |
| Focal segmental glomerulosclerosis                        | 11 (13.3)                                 | 4 (16.7)                                     |         |
| Glomerular basement membrane abnormality                  | 2 (2.4)                                   | 0 (0)                                        |         |
| Hypertensive                                              | 1 (1.2)                                   | 0 (0)                                        |         |
| IC-GN                                                     | 2 (2.4)                                   | 1 (4.2)                                      |         |
| IgAN/Henoch-Schönlein purpura nephritis                   | 44 (53.0)                                 | 13 (54.2)                                    |         |
| Lupus nephritis                                           | 4 (4.8)                                   | 0 (0)                                        |         |
| Lymphoma                                                  | 0 (0)                                     | 1 (4.2)                                      |         |
| Membranoproliferative glomerulonephritis                  | 1 (1.2)                                   | 1 (4.2)                                      |         |
| Membranous nephropathy                                    | 5 (6.0)                                   | 3 (12.5)                                     |         |
| Minimal change disease                                    | 1 (1.2)                                   | 1 (4.2)                                      |         |
| Nonspecific histology                                     | 2 (2.4)                                   | 0 (0)                                        |         |
| Pauci-immune glomerulonephritis                           | 4 (4.8)                                   | 0 (0)                                        |         |
| Podocytopathy                                             | 2 (2.4)                                   | 0 (0)                                        |         |
| Thrombotic microangiopathy                                | 1 (1.2)                                   | 0 (0)                                        |         |

Data are expressed as median (interquartile range) or number (%).

COVID-19, coronavirus disease 2019; IgAN, immunoglobulin A nephropathy; IC-GN, immune complex-mediated glomerulonephritis.

<sup>a</sup>Patients with a history of COVID-19 before biopsy were excluded; <sup>b</sup>missing values in 66 (79.5%).
