# Supplementary material for: Glomerulonephritis following COVID-19 infection or vaccination: a multicenter study in South Korea
Source: PubMed Central journal article supplement — Kidney Res Clin Pract. 2024 Mar 20;43(2):165–76. doi: 10.23876/j.krcp.23.219 (PMC11016674; doi:10.23876/j.krcp.23.219), 2024-03-20
Supplement: j-krcp-23-219-Supplementary-Table-3.pdf [file j-krcp-23-219-Supplementary-Table-3.pdf]

**Supplementary Table 3.** The monthly proportion of glomerulonephritis at Severance Hospital after the initiation of nationwide vaccine program (after April 2021) based on the Bayesian structural time-series models

| Pathologic finding         | Observed value | Predicted value (95% CI) | Absolute effect (95% CI) | Posterior probability of causal impact (%) <sup>a</sup> | Posterior tail-area probability p-value |
|----------------------------|----------------|--------------------------|--------------------------|---------------------------------------------------------|-----------------------------------------|
| Total                      | 1.19           | 1.18 (1.00–1.30)         | 0.01 (–0.14 to 0.16)     | 53.99                                                   | 0.460                                   |
| AIN                        | 2.43           | 1.47 (0.41–2.50)         | 0.96 (–0.11 to 2.00)     | 96.17                                                   | 0.038                                   |
| ATI                        | 1.97           | 1.60 (0.34–2.90)         | 0.37 (–0.92 to 1.60)     | 71.16                                                   | 0.288                                   |
| IgAN                       | 38.57          | 37.95 (32.00–44.00)      | 0.61 (–5.20 to 6.30)     | 57.90                                                   | 0.421                                   |
| MN                         | 6.48           | 6.90 (4.40–9.50)         | –0.43 (–3.00 to 2.10)    | 63.22                                                   | 0.368                                   |
| Nonspecific histology      | 6.59           | 4.08 (2.00–6.20)         | 2.51 (0.37 to 4.60)      | 98.90                                                   | 0.011                                   |
| Other nephropathies        | 12.23          | 15.70 (12.00–20.00)      | –3.47 (–7.40 to 0.42)    | 95.59                                                   | 0.044                                   |
| IC-GN                      | 9.72           | 10.77 (6.40–15.00)       | –1.05 (–5.40 to 3.30)    | 68.44                                                   | 0.316                                   |
| Pauci-immune crescentic GN | 2.62           | 6.33 (3.60–9.10)         | –3.71 (–6.40 to –1.00)   | 99.68                                                   | 0.003                                   |
| Podocytopathy              | 18.82          | 13.70 (9.50–18.00)       | 5.12 (0.80 to 9.30)      | 98.94                                                   | 0.011                                   |
| Thrombotic microangiopathy | 0.57           | 1.60 (0.30–2.90)         | –1.03 (–2.40 to 0.27)    | 93.91                                                   | 0.061                                   |

AIN, acute interstitial nephritis; ATI, acute tubular injury; CI, confidence interval; GN, glomerulonephritis; IC-GN, immune complex-mediated GN; IgAN, immunoglobulin A nephropathy; MN, membranous nephropathy.

<sup>a</sup>Probability threshold, 95%.
