# Supplementary material for: Glomerulonephritis following COVID-19 infection or vaccination: a multicenter study in South Korea
Source: PubMed Central journal article supplement — Kidney Res Clin Pract. 2024 Mar 20;43(2):165–76. doi: 10.23876/j.krcp.23.219 (PMC11016674; doi:10.23876/j.krcp.23.219), 2024-03-20
Supplement: j-krcp-23-219-Supplementary-Table-4.pdf [file j-krcp-23-219-Supplementary-Table-4.pdf]

**Supplementary Table 4.** The monthly proportion of glomerulonephritis at Severance Hospital after the initiation of nationwide vaccine program (after April 2021) based on the ARIMA models

| Pathologic finding         | AIC    | BIC    | ARIMA model         | Ljung-Box test p-value | Step change (95% CI)      | Slope change (95% CI)    |
|----------------------------|--------|--------|---------------------|------------------------|---------------------------|--------------------------|
| Total                      | -10.05 | 4.53   | (1,0,0)(0,0,1) [12] | 0.9870                 | -0.014 (-0.235 to 0.208)  | 0.001 (-0.016 to 0.017)  |
| AIN                        | 144.06 | 156.22 | (0,0,0)(1,0,0) [12] | 0.9567                 | -0.435 (-0.908 to 0.039)  | 0.049 (0.013 to 0.084)   |
| ATI                        | 132.51 | 144.66 | (0,0,0)(1,0,0) [12] | 0.1236                 | 0.092 (-0.343 to 0.528)   | 0.003 (-0.029 to 0.036)  |
| IgAN                       | 87.97  | 97.7   | (0,0,0)             | 0.3889                 | 0.125 (-0.233 to 0.484)   | -0.011 (-0.038 to 0.017) |
| MN                         | 285.83 | 297.99 | (0,0,0)(1,0,0) [12] | 0.1240                 | -0.455 (-1.559 to 0.649)  | 0.039 (-0.044 to 0.122)  |
| Nonspecific histology      | 260.02 | 277.03 | (3,0,0)             | 0.3360                 | 0.823 (-0.057 to 1.704)   | -0.031 (-0.100 to 0.038) |
| Other nephropathies        | 301.37 | 311.09 | (0,0,0)             | 0.6508                 | -1.627 (-2.904 to -0.349) | 0.090 (-0.008 to 0.188)  |
| IC-GN                      | 229.04 | 238.76 | (0,0,0)             | 0.7030                 | -0.286 (-1.116 to 0.545)  | 0.032 (-0.032 to 0.096)  |
| Pauci-immune crescentic GN | 226.87 | 239.03 | (0,0,0)(0,0,1) [12] | 0.6133                 | -0.663 (-1.507 to 0.182)  | 0.011 (-0.056 to 0.078)  |
| Podocytopathy              | 152.96 | 165.12 | (0,0,1)             | 0.4722                 | 0.827 (0.168 to 1.485)    | -0.041 (-0.091 to 0.010) |
| Thrombotic microangiopathy | 121.68 | 131.4  | (0,0,0)             | 0.4692                 | -0.174 (-0.613 to 0.264)  | -0.006 (-0.040 to 0.027) |

AIC, Akaike's information criterion; AIN, acute interstitial nephritis; ARIMA, autoregressive integrated moving average; ATI, acute tubular injury; BIC, Bayes information criterion; CI, confidence interval; GN, glomerulonephritis; IC-GN, immune complex-mediated GN; IgAN, immunoglobulin A nephropathy; MN, membranous nephropathy.
