# Supplementary material for: Glomerulonephritis following COVID-19 infection or vaccination: a multicenter study in South Korea
Source: PubMed Central journal article supplement — Kidney Res Clin Pract. 2024 Mar 20;43(2):165–76. doi: 10.23876/j.krcp.23.219 (PMC11016674; doi:10.23876/j.krcp.23.219), 2024-03-20
Supplement: j-krcp-23-219-Supplementary-Table-5.pdf [file j-krcp-23-219-Supplementary-Table-5.pdf]

**Supplementary Table 5.** The monthly proportion of glomerulonephritis at Severance Hospital during the COVID-19 pandemic period (after February 2022) based on the Bayesian structural time-series models

| Pathologic finding         | Observed value | Predicted value (95% CI) | Absolute effect (95% CI) | Posterior probability of causal impact (%) <sup>a</sup> | Posterior tail-area probability p-value |
|----------------------------|----------------|--------------------------|--------------------------|---------------------------------------------------------|-----------------------------------------|
| Total                      | 1.26           | 1.15 (0.96 to 1.30)      | 0.11 (-0.09 to 0.30)     | 86.83                                                   | 0.132                                   |
| AIN                        | 4.22           | 1.13 (-0.26 to 2.60)     | 3.09 (1.70 to 4.50)      | 99.98                                                   | <0.001                                  |
| ATI                        | 1.77           | 1.61 (0.06 to 3.3)       | 0.16 (-1.50 to 1.70)     | 57.37                                                   | 0.426                                   |
| IgAN                       | 36.83          | 39.05 (32.00 to 47.00)   | -2.22 (-10.00 to 5.20)   | 71.87                                                   | 0.281                                   |
| MN                         | 7.61           | 6.26 (3.20 to 9.40)      | 1.35 (-1.80 to 4.40)     | 79.46                                                   | 0.205                                   |
| Nonspecific histology      | 4.98           | 4.81 (1.60 to 7.90)      | 0.17 (-3.00 to 3.30)     | 54.16                                                   | 0.458                                   |
| Other nephropathies        | 13.82          | 14.92 (9.90 to 20.00)    | -1.10 (-6.10 to 4.00)    | 66.60                                                   | 0.334                                   |
| IC-GN                      | 12.21          | 9.82 (4.30 to 15.00)     | 2.40 (-3.20 to 7.90)     | 80.04                                                   | 0.200                                   |
| Pauci-immune crescentic GN | 2.97           | 5.73 (2.30 to 9.30)      | -2.76 (-6.30 to 0.63)    | 94.38                                                   | 0.056                                   |
| Podocytopathy              | 15.25          | 15.24 (9.50 to 21.00)    | 0.009 (-6.00 to 5.70)    | 50.37                                                   | 0.496                                   |
| Thrombotic microangiopathy | 0.34           | 1.45 (-0.22 to 3.20)     | -1.12 (-2.80 to 0.55)    | 90.14                                                   | 0.099                                   |

AIN, acute interstitial nephritis; ATI, acute tubular injury; CI, confidence interval; COVID-19, coronavirus disease 2019; GN, glomerulonephritis; IC-GN, immune complex-mediated GN; IgAN, immunoglobulin A nephropathy; MN, membranous nephropathy.

<sup>a</sup>Probability threshold: 95%.
