# Supplementary material for: Glomerulonephritis following COVID-19 infection or vaccination: a multicenter study in South Korea
Source: PubMed Central journal article supplement — Kidney Res Clin Pract. 2024 Mar 20;43(2):165–76. doi: 10.23876/j.krcp.23.219 (PMC11016674; doi:10.23876/j.krcp.23.219), 2024-03-20
Supplement: j-krcp-23-219-Supplementary-Table-6.pdf [file j-krcp-23-219-Supplementary-Table-6.pdf]

**Supplementary Table 6. The monthly proportion of glomerulonephritis at Severance Hospital during the COVID-19 pandemic period (after February 2022) based on the ARIMA models**

| Pathologic finding         | AIC    | BIC    | ARIMA model         | Ljung-Box test p-value | Step change (95% CI)     | Slope change (95% CI)    |
|----------------------------|--------|--------|---------------------|------------------------|--------------------------|--------------------------|
| Total                      | -10.35 | 4.23   | (1,0,0)(0,0,1) [12] | 0.9921                 | 0.089 (-0.233 to 0.411)  | -0.009 (-0.056 to 0.037) |
| AIN                        | 143.44 | 155.59 | (0,0,0)(1,0,0) [12] | 0.8223                 | 0.583 (-0.110 to 1.275)  | -0.014 (-0.114 to 0.086) |
| ATI                        | 133.1  | 145.25 | (0,0,0)(1,0,0) [12] | 0.1597                 | -0.049 (-0.696 to 0.597) | 0.018 (-0.076 to 0.112)  |
| IgAN                       | 86.65  | 96.37  | (0,0,0)             | 0.2823                 | 0.232 (-0.265 to 0.730)  | -0.048 (-0.121 to 0.024) |
| MN                         | 283.83 | 295.92 | (0,1,1)(1,0,0) [12] | 0.0119                 | -0.622 (-2.289 to 1.043) | 0.192 (-0.039 to 0.423)  |
| Nonspecific histology      | 264.13 | 276.29 | (0,0,1)             | 0.4471                 | -0.456 (-2.183 to 1.270) | 0.077 (-0.173 to 0.326)  |
| Other nephropathies        | 306.87 | 316.6  | (0,0,0)             | 0.7659                 | -0.781 (-2.627 to 1.066) | 0.121 (-0.147 to 0.389)  |
| IC-GN                      | 227.15 | 236.87 | (0,0,0)             | 0.5998                 | 0.834 (-0.315 to 1.982)  | -0.064 (-0.231 to 0.102) |
| Pauci-immune crescentic GN | 231.44 | 243.6  | (0,0,0)(0,0,1) [12] | 0.6303                 | -0.521 (-1.683 to 0.641) | 0.011 (-0.157 to 0.179)  |
| Podocytopathy              | 159.13 | 171.28 | (0,0,1)             | 0.2782                 | 0.218 (-0.725 to 1.162)  | -0.022 (-0.159 to 0.114) |
| Thrombotic microangiopathy | 123.91 | 33.63  | (0,0,0)             | 0.4586                 | -0.220 (-0.841 to 0.401) | 0.000 (-0.090 to 0.090)  |

AIC, Akaike's information criterion; AIN, acute interstitial nephritis; ARIMA, autoregressive integrated moving average; ATI, acute tubular injury; BIC, Bayes information criterion; CI, confidence interval; COVID-19, coronavirus disease 2019; GN, glomerulonephritis; IC-GN, immune complex-mediated GN; IgAN, immunoglobulin A nephropathy; MN, membranous nephropathy.
